# Supplementary material
Source: publisher figshare collection journal article supplement (https://gsapubs.figshare.com/ndownloader/files/23298416)
Supplement: Supplementary file 1 [file 23298416]

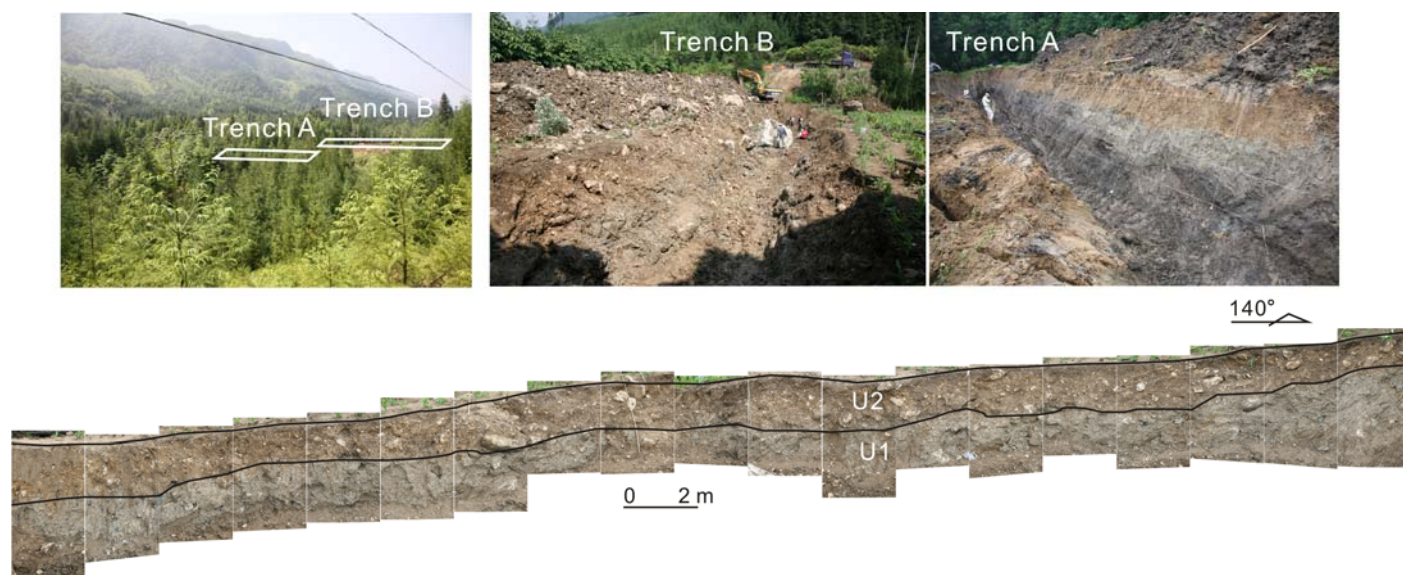

Figure DR1. Trenching site at Dachuan and photos of trenches A and B. Trench A is about 30 m long revealing peat layers. Trench B is about 50 m revealing debris flow deposit (U1 is slightly darker than U2, components of U1 and U2 are almost the same). Layout of the two trenches in the fault valley is to constrain the detailed location of the DSF.
